# Supplementary material
Source: publisher site journal article supplement (https://www.dovepress.com/article/463499)
Supplement: Supplementary file 1 [file get_supplementary_file.php]

**Supplementary figure 1 | Five most commonly co-occurring fibrotic conditions in people whose records included diagnosis of pulmonary fibrosis and on other fibrotic condition.**

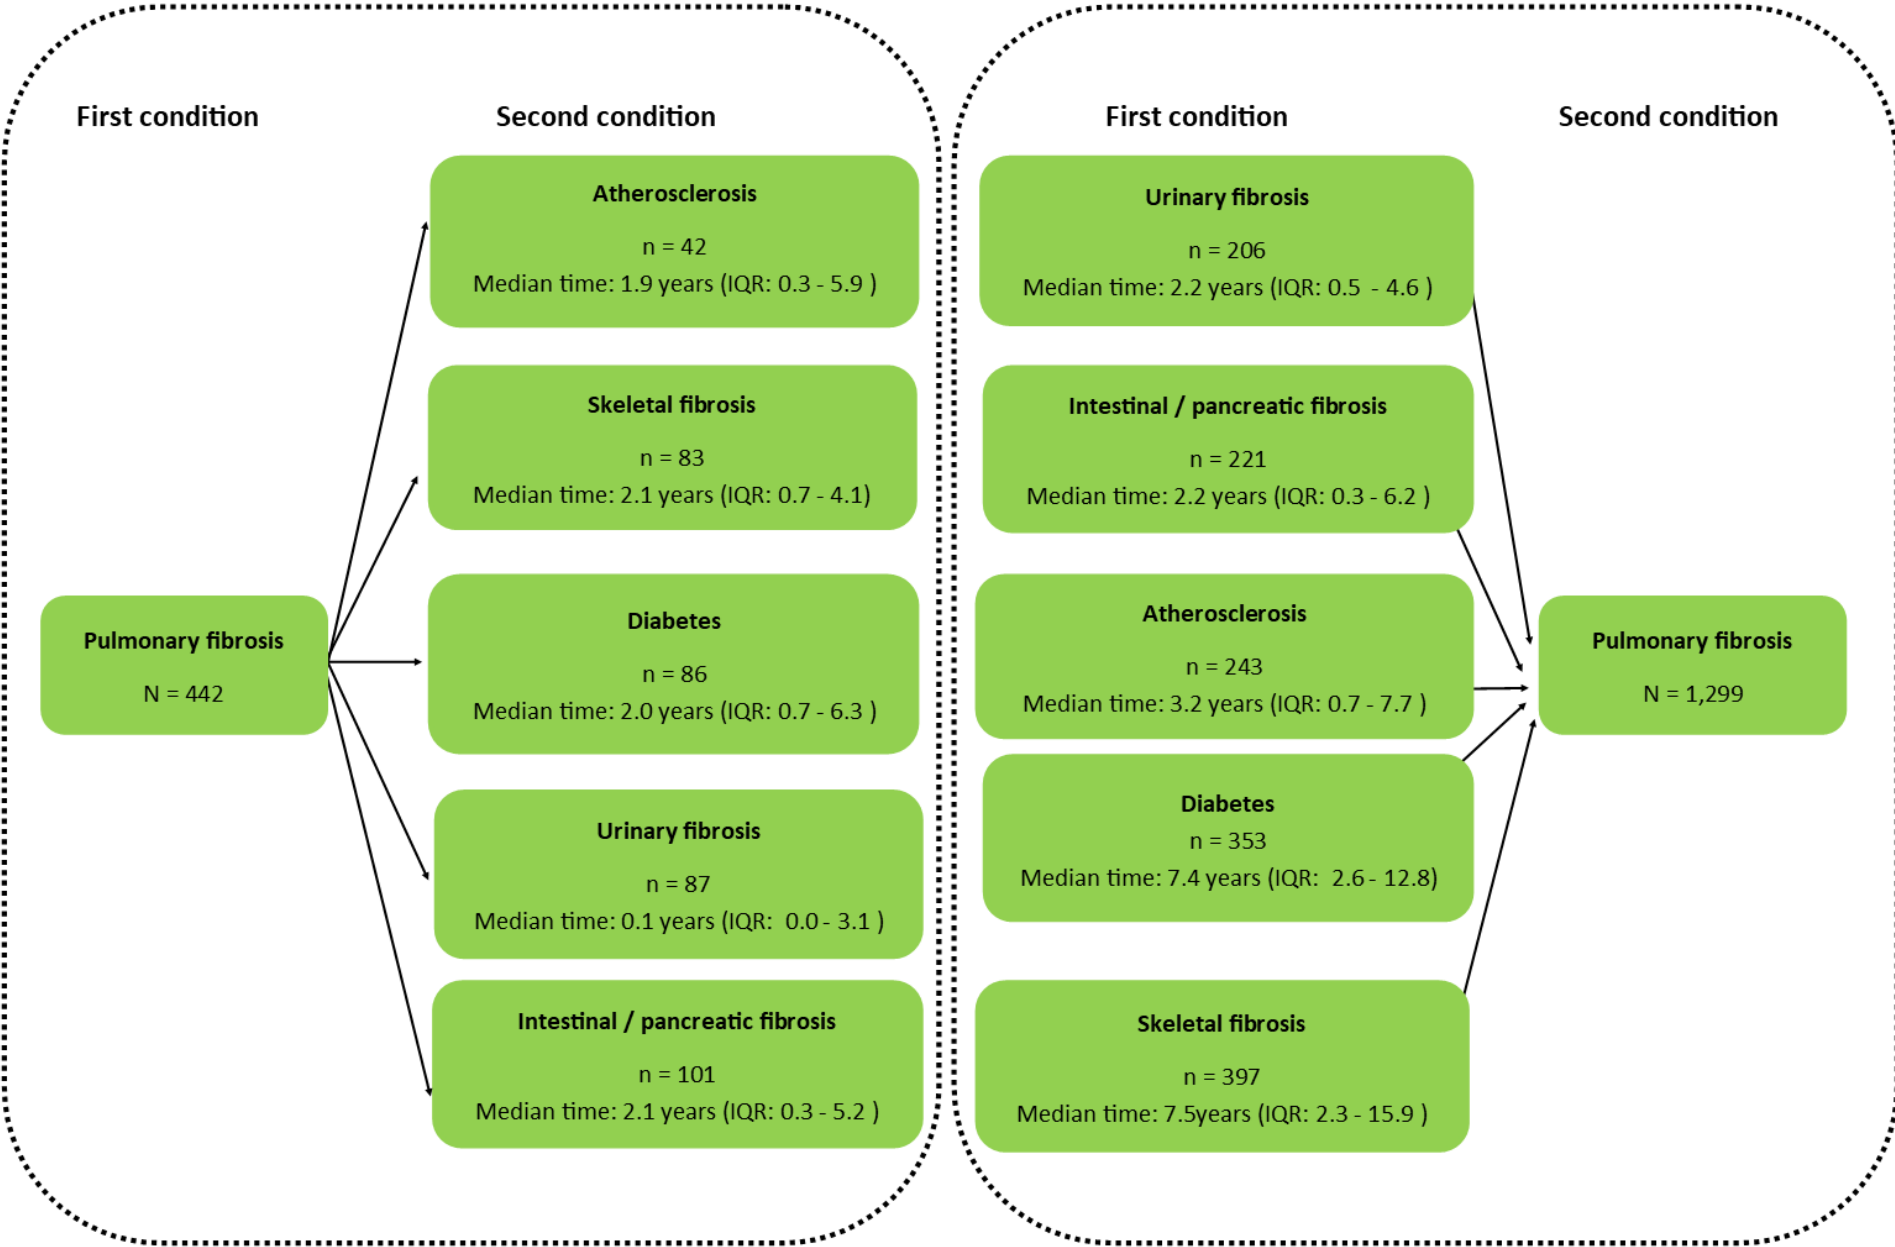

Supplementary figure 2 | Five most commonly co-occurring fibrotic conditions in people whose records included diagnosis of urinary fibrosis and on other fibrotic condition.

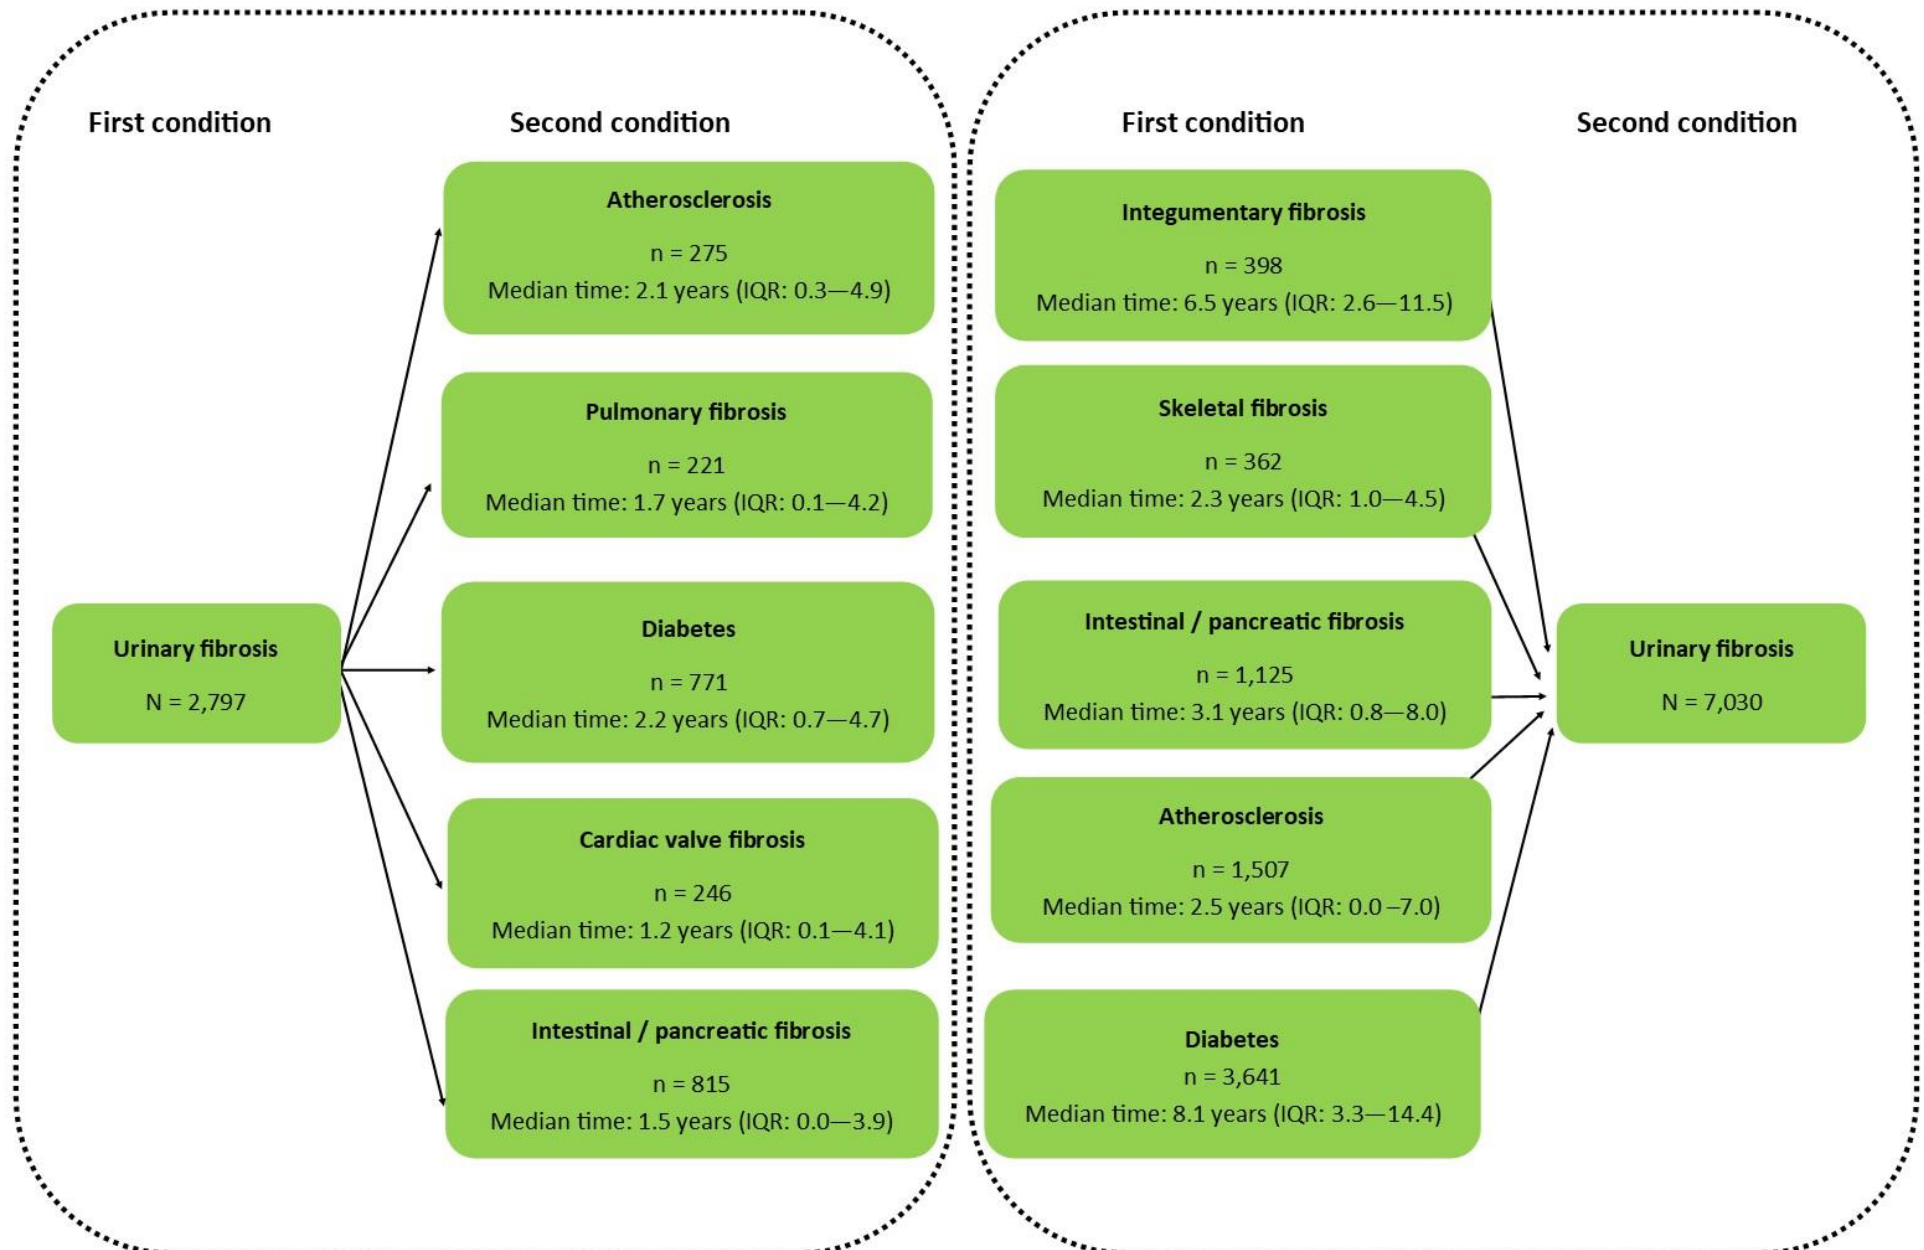

Supplementary figure 3 | Five most commonly co-occurring fibrotic conditions in people whose records included diagnosis of liver cirrhosis and on other fibrotic condition.

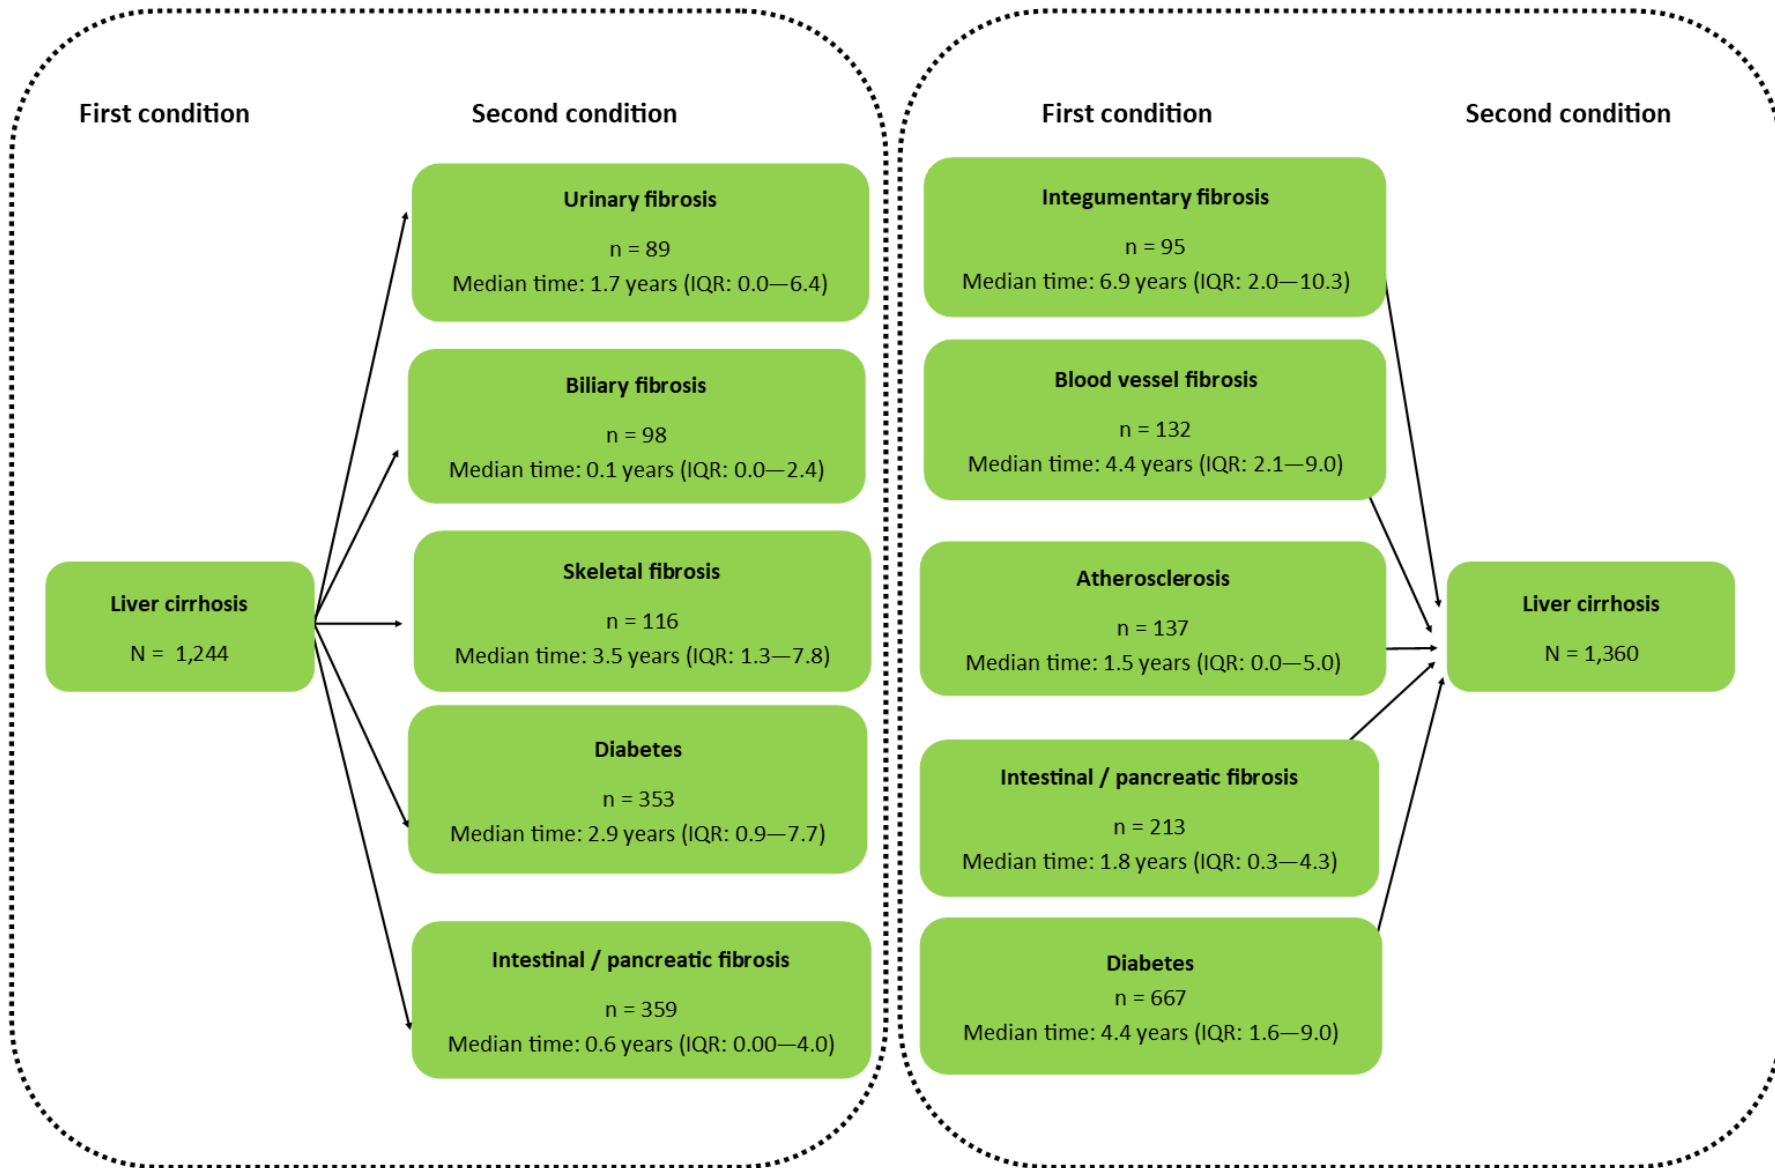

**Supplementary table 1 | Baseline characteristics of age and sex per fibrotic condition.**

| <b>Population</b>                  | <b>N</b> | <b>Prevalence (%)</b> | <b>Median age</b> | <b>Female (%)</b> | <b>Male (%)</b> |
|------------------------------------|----------|-----------------------|-------------------|-------------------|-----------------|
| General population                 | 993,370  | -                     | 46                | 50.26             | 49.74           |
| Atherosclerosis                    | 32,466   | 3.27                  | 72                | 31.67             | 68.33           |
| Bile duct fibrosis                 | 8,033    | 0.81                  | 64                | 68.26             | 31.74           |
| Blood vessel fibrosis              | 14,672   | 1.48                  | 67                | 56.20             | 43.80           |
| Cardiomyopathy                     | 4,573    | 0.46                  | 69                | 32.45             | 67.55           |
| Diabetes                           | 91,259   | 9.19                  | 64                | 49.54             | 50.46           |
| Integumentary fibrosis             | 27,810   | 2.80                  | 62                | 57.65             | 42.35           |
| Intestinal and pancreatic fibrosis | 56,031   | 5.64                  | 68                | 55.30             | 44.70           |
| Liver cirrhosis                    | 9,661    | 0.13                  | 57                | 44.05             | 55.95           |
| Lymphahtic fibrosis                | 1,278    | 0.13                  | 64                | 46.79             | 53.21           |
| Peritoneal fibrosis                | 783      | 0.08                  | 62                | 44.83             | 55.17           |
| Reproductive fibrosis              | 18,863   | 1.90                  | 48                | 71.48             | 28.52           |
| Pulmonary fibrosis                 | 6,057    | 0.61                  | 78                | 39.99             | 60.01           |
| Skeletal fibrosis                  | 14,597   | 1.47                  | 67                | 67.67             | 32.33           |
| Systemic fibrosis                  | 2,636    | 0.27                  | 64                | 75.04             | 24.96           |
| Urinary fibrosis                   | 32,765   | 3.30                  | 77                | 52.40             | 47.60           |
| Valve fibrosis                     | 12,939   | 1.30                  | 76                | 50.17             | 49.83           |
| Any fibrotic condition             | 213,197  | 21.46                 | 65                | 53.32             | 46.68           |

|                 | Urinary            | Liver              | Diabetes           | BloodVessel        | Atherosclerosis    | Biliary            | Cardiomyopathy     | Integumentary      | Intest-Panc        | Reproductive       | Skeletal           | Systemic           | Valve              |
|-----------------|--------------------|--------------------|--------------------|--------------------|--------------------|--------------------|--------------------|--------------------|--------------------|--------------------|--------------------|--------------------|--------------------|
| Pulmonary       | 0.16 (0.15 - 0.17) | N/A                | 0.17 (0.16 - 0.18) | N/A                | 0.13 (0.12 - 0.14) | N/A                | N/A                | N/A                | 0.16 (0.15 - 0.17) | N/A                | 0.05 (0.04 - 0.06) | N/A                | 0.07 (0.06 - 0.08) |
| Urinary         |                    | 0.10 (0.09 - 0.11) | 1.13 (1.11 - 1.16) | 0.20 (0.19 - 0.21) | 0.63 (0.61 - 0.65) | 0.10 (0.09 - 0.11) | 0.11 (0.10 - 0.12) | 0.20 (0.19 - 0.22) | 0.78 (0.76 - 0.80) | 0.07 (0.06 - 0.08) | 0.14 (0.13 - 0.15) | N/A                | 0.32 (0.31 - 0.33) |
| Liver           |                    |                    | 0.29 (0.28 - 0.30) | 0.06 (0.05 - 0.07) | 0.09 (0.08 - 0.09) | 0.06 (0.06 - 0.07) | N/A                | 0.05 (0.05 - 0.06) | 0.23 (0.22 - 0.24) | N/A                | 0.03 (0.03 - 0.04) | N/A                | N/A                |
| Diabetes        |                    |                    |                    | 0.30 (0.29 - 0.32) | 1.11 (1.09 - 1.14) | 0.18 (0.17 - 0.19) | 0.14(0.13 - 0.15)  | 0.45 (0.44 - 0.47) | 1.24 (1.21 - 1.27) | 0.21 (0.20 - 0.22) | 0.30 (0.29 - 0.32) | 0.05 (0.04 - 0.05) | 0.35 (0.34 - 0.37) |
| BloodVessel     |                    |                    |                    |                    | 0.14 (0.13 - 0.15) | N/A                | N/A                | 0.09 (0.08 - 0.10) | 0.26 (0.25 - 0.27) | N/A                | 0.07 (0.06 - 0.08) | N/A                | 0.06 (0.06 - 0.07) |
| Atherosclerosis |                    |                    |                    |                    |                    | 0.08 (0.07 - 0.09) | 0.14 (0.13 - 0.15) | 0.18 (0.17 - 0.19) | 0.66 (0.63 - 0.68) | 0.06 (0.06 - 0.07) | 0.14 (0.13 - 0.15) | N/A                | 0.48 (0.46 - 0.50) |
| Biliary         |                    |                    |                    |                    |                    |                    | N/A                | N/A                | 0.23 (0.22 - 0.24) | N/A                | 0.03 (0.03 - 0.04) | N/A                | N/A                |
| Cardiomyopathy  |                    |                    |                    |                    |                    |                    |                    | N/A                | 0.09 (0.08 - 0.09) | N/A                | N/A                | N/A                | 0.08 (0.07 - 0.09) |
| Integumentary   |                    |                    |                    |                    |                    |                    |                    |                    | 0.35 (0.33 - 0.36) | 0.09 (0.08 - 0.10) | 0.09 (0.09 - 0.10) | N/A                | 0.08 (0.07 - 0.08) |
| Intest-Panc     |                    |                    |                    |                    |                    |                    |                    |                    |                    | 0.16 (0.15 - 0.17) | 0.22 (0.21 - 0.23) | 0.05 (0.04 - 0.06) | 0.29 (0.28 - 0.30) |
| Reproductive    |                    |                    |                    |                    |                    |                    |                    |                    |                    |                    | 0.04 (0.03 - 0.05) | N/A                | N/A                |
| Skeletal        |                    |                    |                    |                    |                    |                    |                    |                    |                    |                    |                    | 0.04 (0.03 - 0.05) | 0.06 (0.05 - 0.07) |
| Systemic        |                    |                    |                    |                    |                    |                    |                    |                    |                    |                    |                    |                    | N/A                |
| Valve           |                    |                    |                    |                    |                    |                    |                    |                    |                    |                    |                    |                    | N/A                |

|  |                |
|--|----------------|
|  | >1.00          |
|  | 0.5 < X < 1.00 |
|  | 0.25 < X < 0.5 |

**Supplementary table 2 | Prevalences of multi-morbid fibrosis**

The prevalences of multi-morbid fibrosis within the random sample of UK adults, derived from CPRD and HES admitted patient care. Displayed alongside a 99% confidence interval; the values recorded as N/A were less than 0.05% and therefore redacted. Lymphatic and peritoneal fibrosis were removed from this table due to having no values which were not redacted.

| <b>Fibrotic Condition</b> | <b>Location (first diagnosed)</b> | <b>Percentage</b> |
|---------------------------|-----------------------------------|-------------------|
|                           |                                   |                   |
| Atherosclerosis           | GP                                | 1.37374484        |
| Atherosclerosis           | Hospital                          | 98.5708125        |
| Atherosclerosis           | Death Certificate                 | 0.05544262        |
|                           |                                   |                   |
| Biliary                   | GP                                | 7.12062741        |
| Biliary                   | Hospital                          | 92.5183618        |
| Biliary                   | Death Certificate                 | 0.36101083        |
|                           |                                   |                   |
| BloodVessel               | GP                                | 78.4487459        |
| BloodVessel               | Hospital                          | 20.5766085        |
| BloodVessel               | Death Certificate                 | 0.97464558        |
|                           |                                   |                   |
| Cardiomyopathy            | GP                                | 43.0133392        |
| Cardiomyopathy            | Hospital                          | 34.6818281        |
| Cardiomyopathy            | Death Certificate                 | 22.3048327        |
|                           |                                   |                   |
| Diabetes                  | GP                                | 94.4827359        |
| Diabetes                  | Hospital                          | 5.44494242        |
| Diabetes                  | Death Certificate                 | 0.07232163        |
|                           |                                   |                   |
| Integumentary             | GP                                | 81.700827         |
| Integumentary             | Hospital                          | 18.1445523        |
| Integumentary             | Death Certificate                 | 0.15462064        |
|                           |                                   |                   |
| Intest-Panc               | GP                                | 11.959451         |
| Intest-Panc               | Hospital                          | 87.9066945        |
| Intest-Panc               | Death Certificate                 | 0.13385447        |
|                           |                                   |                   |
| Liver                     | GP                                | 22.2130214        |
| Liver                     | Hospital                          | 76.7622399        |
| Liver                     | Death Certificate                 | 1.02473864        |
|                           |                                   |                   |
| Lymphatic                 | GP                                | 47.4178404        |
| Lymphatic                 | Hospital                          | 34.8982786        |
| Lymphatic                 | Death Certificate                 | 17.6838811        |
|                           |                                   |                   |
| Peritoneum                | GP                                | 6.1302682         |
| Peritoneum                | Hospital                          | 90.5491699        |
| Peritoneum                | Death Certificate                 | 3.32056194        |
|                           |                                   |                   |
| Pulmonary                 | GP                                | 22.238732         |
| Pulmonary                 | Hospital                          | 42.8264818        |
| Pulmonary                 | Death Certificate                 | 34.9347862        |
|                           |                                   |                   |
| Reproductive              | GP                                | 42.1141918        |
| Reproductive              | Hospital                          | 57.8805068        |
| Reproductive              | Death Certificate                 | 0.00530138        |

|                         |                   |            |
|-------------------------|-------------------|------------|
| Skeletal                | GP                | 65.109269  |
| Skeletal                | Hospital          | 33.7946153 |
| Skeletal                | Death Certificate | 1.09611564 |
|                         |                   |            |
| Systemic                | GP                | 55.6145675 |
| Systemic                | Hospital          | 44.0440061 |
| Systemic                | Death Certificate | 0.3414264  |
|                         |                   |            |
| Urinary                 | GP                | 53.1664886 |
| Urinary                 | Hospital          | 46.3360293 |
| Urinary                 | Death Certificate | 0.49748207 |
|                         |                   |            |
| Valve                   | GP                | 36.339748  |
| Valve                   | Hospital          | 63.1810805 |
| Valve                   | Death Certificate | 0.4791715  |
|                         |                   |            |
| All fibrotic conditions | GP                | 52.42582   |
| All fibrotic conditions | Hospital          | 46.3015403 |
| All fibrotic conditions | Death Certificate | 1.27263974 |

**Supplementary table 3 | Proportion of diagnoses first recorded in general practice (CPRD Aurum), hospital (HES admitted patient care) and death certificate (ONS records)**
